# Supplementary material for: Hierarchical carbon and nitrogen adsorbed PtNiCo nanocomposites with multiple active sites for oxygen reduction and methanol oxidation reactions
Source: Royal Society of Chemistry journal article supplement (doi:10.1039/c6ta05205c), 2016-01-01
Supplement: c6ta05205c1.pdf [file c6ta05205c1.pdf]

Figure S1

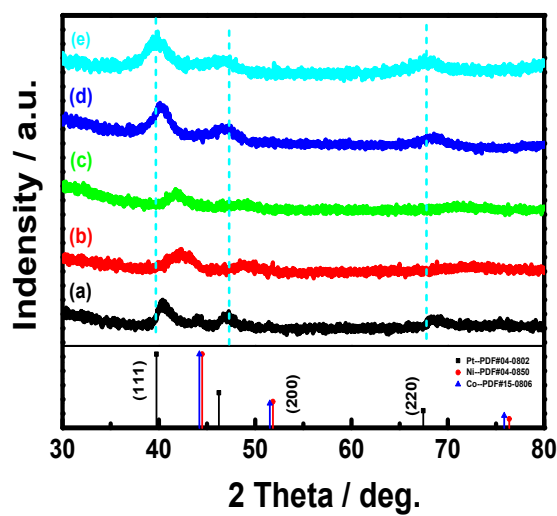

Fig.S1 XRD patterns of the PtNiCo samples. (a) NCs, (b) CHs, (c) CTs, (d) NPs, and (e) NSs.

**Figure S2**

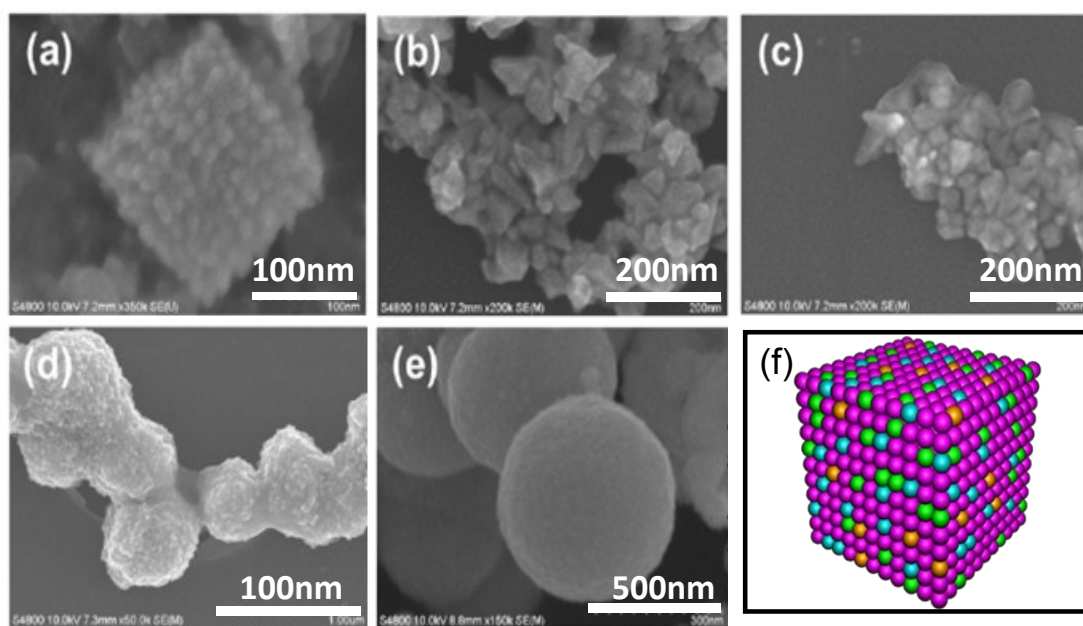

**Fig.S2** SEM images of PtNiCo catalysts. (a) NCs, (b) CHs, (c) CTs, (d) NPs, (e) NSs, and (f) geometric model of individual NCs structure.

**Figure S3**

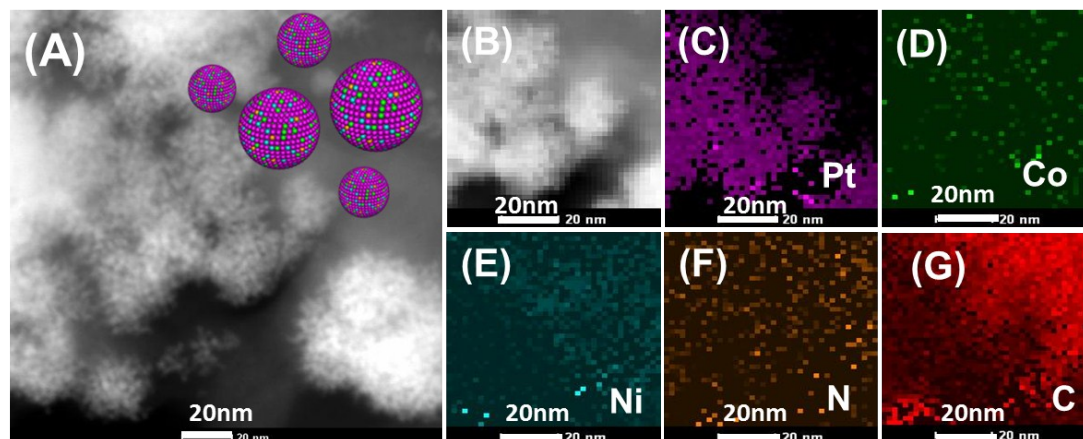

**Fig.S3** HAADF-STEM images and the corresponding mapping results of Pt, Ni, Co, C and N for NPs sample (A)-(G).

Figure S4

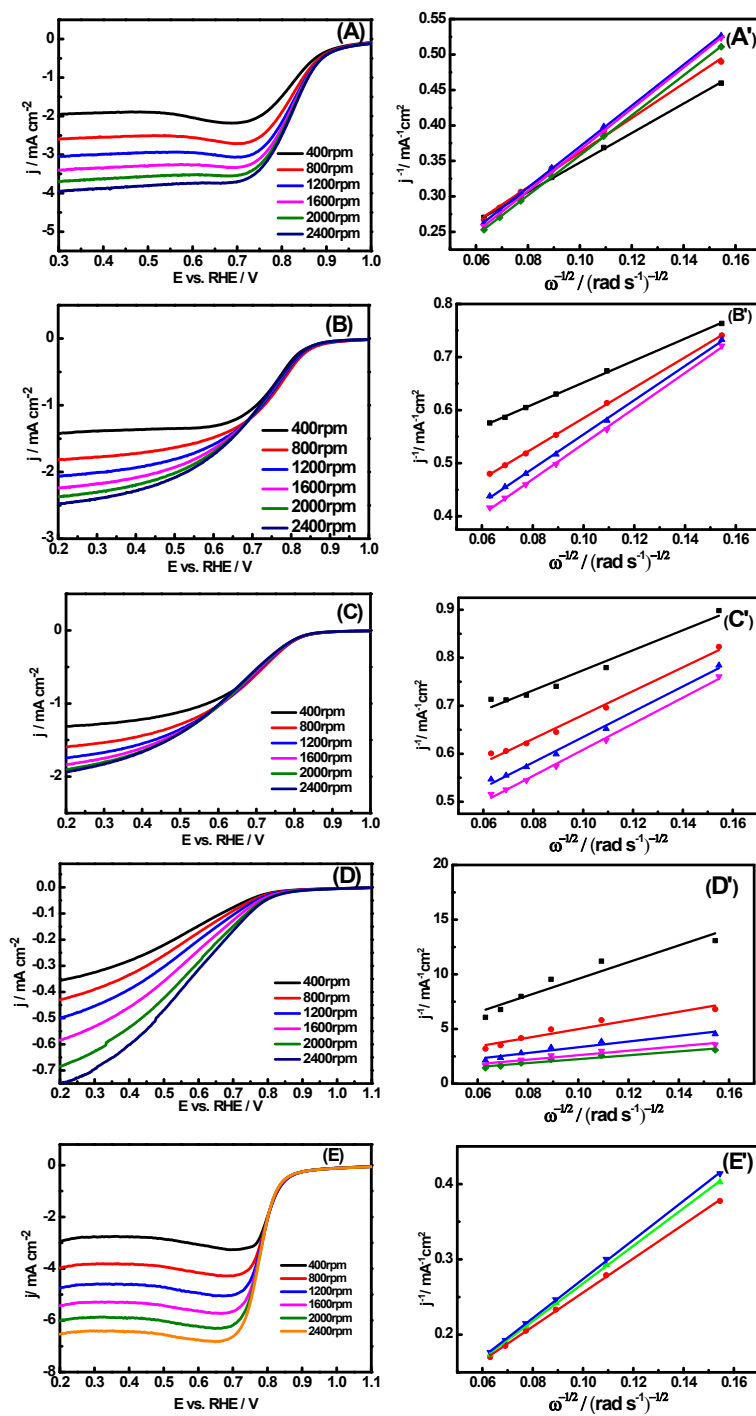

**Fig.S4** ORR polarization curves at different rotation rates and K-L plots of the ORR for (A) CHs, (B) CTs, (C) NPs, (D) NSs and (E) the commercial Pt/C catalysts.

Figure S5

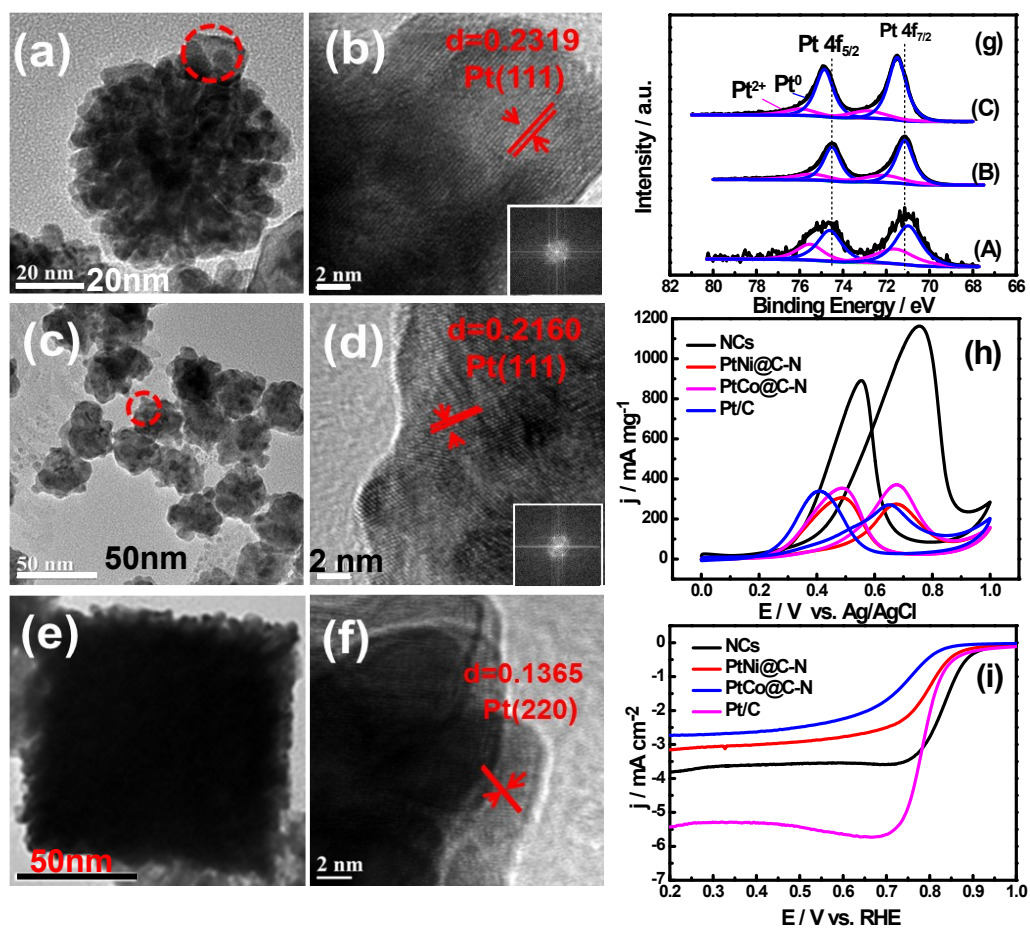

**Fig.S5** HRTEM images of (a, b) PtNi@C-N, (c, d) PtCo@C-N, (e, f) NCs catalysts. (g) XPS of Pt 4f for PtNi@C-N (A), PtCo@C-N (B), NCs (C) catalysts. (h) MOR and (i) ORR property of PtNi@C-N, PtCo@C-N, NCs, and the commercial Pt/C catalysts.

**Table S1.** ECSA for PtNiCo samples and the Pt/C catalysts in N<sub>2</sub>-saturated 0.5 M H<sub>2</sub>SO<sub>4</sub> at a scan rate of 100 mV s<sup>-1</sup>. Mass and Specific activity for PtNiCo samples and the Pt/C catalysts in 0.5 M H<sub>2</sub>SO<sub>4</sub> + 1.0 M CH<sub>3</sub>OH at a scan rate of 50 mV s<sup>-1</sup>.

| <b>Samples</b> | <b>ECSA/m<sup>2</sup>·g<sup>-1</sup><sub>Pt</sub></b> | <b>MA/mA mg<sup>-1</sup></b> | <b>SA/mA cm<sup>-2</sup></b> |
|----------------|-------------------------------------------------------|------------------------------|------------------------------|
| NCs            | 72.4                                                  | 1165                         | 1.6                          |
| CHs            | 64.4                                                  | 898.3                        | 1.4                          |
| CTs            | 43.4                                                  | 598. 1                       | 1.37                         |
| NPs            | 22.5                                                  | 84.1                         | 0.37                         |
| NSs            | 10.4                                                  | 71.7                         | 0.7                          |
| Pt/C           | 37.0                                                  | 271.1                        | 0.73                         |

**Table S2.** Peak potential, onset potential of CO oxidation and ECSA for PtNiCo samples and the Pt/C catalyst in CO-stripping voltammograms which obtained in CO-saturated 0.1 M HClO<sub>4</sub> at a scan rate of 50 mV·s<sup>-1</sup>.

| <b>Sample</b> | <b>Peak potential of CO oxidation (V)</b> | <b>Onset potential of CO oxidation (V)</b> | <b>ECSA/m<sup>2</sup>·g<sup>-1</sup><sub>Pt</sub></b> |
|---------------|-------------------------------------------|--------------------------------------------|-------------------------------------------------------|
| NCs           | 0.80                                      | 0.45                                       | 35.8                                                  |
| CHs           | 0.75                                      | 0.66                                       | 34.9                                                  |
| CTs           | 0.75                                      | 0.66                                       | 35.8                                                  |
| NPs           | 0.86                                      | 0.76                                       | 7.0                                                   |
| NSs           | 0.94                                      | 0.81                                       | 0.54                                                  |
| Pt/C          | 0.94                                      | 0.86                                       | 34.1                                                  |

**Table S3.** The number of transferred electrons ( $n$ ) value for these nanocomposites.

| Sample | 0.7 V | 0.6 V | 0.5 V | 0.4 V | 0.3 V | $n$ |
|--------|-------|-------|-------|-------|-------|-----|
| NCs    | 4.0   | 3.4   | 3.10  | 3.1   | 3.2   | 3.4 |
| CHs    | 4.3   | 3.7   | 3.2   | 3.1   | 3.2   | 3.6 |
| CTs    | –     | 4.3   | 3.2   | 2.80  | 2.7   | 3.3 |
| NPs    | –     | –     | 4.3   | 3.6   | 3.5   | 3.8 |
| Pt/C   | 4.5   | 3.9   | 3.6   | 3.5   | 3.5   | 3.8 |

**Table S4.** The measured current density  $j$ , the kinetics-limited current density  $j_k$ , and the electron transfer number ( $n$ ) values for these nanocomposites.

| Sample | $j$  | $j_k$ | $B$  | $n$ |
|--------|------|-------|------|-----|
| NCs    | 3.59 | 15.94 | 0.37 | 3.4 |
| CHs    | 3.33 | 10.88 | 0.39 | 3.6 |
| CTs    | 1.96 | 3.71  | 0.36 | 3.3 |
| NPs    | 1.64 | 2.43  | 0.41 | 3.8 |
| Pt/C   | 5.32 | 53.26 | 0.41 | 3.8 |
